# Supplementary material
Source: PubMed Central journal article supplement (PMC8729846)
Supplement: ASN.2020111546SupplementaryData.pdf [file ASN.2020111546SupplementaryData.pdf]

## Supplemental data

**Supplementary Table 1:**

| Patients' characteristics     | N (%)     |
|-------------------------------|-----------|
| <b>Age</b>                    |           |
| <b>Gender:</b>                |           |
| <b>Men</b>                    | 30 (83.3) |
| <b>women</b>                  | 6 (16.7)  |
| <b>BMI (mean)</b>             | 29.5      |
| <b>Hypertension</b>           | 16 (44.4) |
| <b>Diabetes mellitus</b>      | 17 (47.3) |
| <b>Obesity</b>                | 18 (50.0) |
| <b>Cardiovascular disease</b> | 3 (8.3)   |
| <b>Chronic lung disease</b>   | 3 (8.3)   |
| <b>Cancer<sup>^</sup></b>     | 2 (5.5)   |
| <b>Chronic kidney disease</b> | 2 (5.5)   |
| <b>Smoking</b>                | 3 (8.3)   |

**Supplementary Table 1:** Patient characteristics. <sup>^</sup>, Hematological malignancy (Chronic lymphocytic leukemia, AML in remission after Bone marrow transplant).

**Supplementary Table 2:**

|                                                               | Patients with AKI | Patients without AKI |
|---------------------------------------------------------------|-------------------|----------------------|
| <b>Number (%)</b>                                             | (22 (61.1))       | 14 (38.9)            |
| <b>Age- mean (median)</b>                                     | 63.7 (67)         | 57.1 (60)            |
| <b>Diabetes</b>                                               | 12 (54.5)         | 5 (35.7)             |
| <b>Hypertension</b>                                           | 13 (59.1)         | 3 (21.4)             |
| <b>Chronic renal failure (%)</b>                              | 2 (9.1)           | 0                    |
| <b>AKI upon admission (%)</b>                                 | 8 (36.4)          | 0                    |
| <b>Renal replacement therapy (%)</b>                          | 13 (59.1)         | 0                    |
| <b>ECMO (%)</b>                                               | 5 (22.7)          | 4 (28.6)             |
| <b>Mortality</b>                                              | 14 (63.3)         | 4 (28.6)             |
| <b>Days to develop AKI- mean (median)</b>                     | 6.4 (4)           | -                    |
| <b>Days to maximal creatinine- mean (median)</b>              | 15.3 (12.5)       | -                    |
| <b>Documented hypotension prior to AKI</b>                    | 19 (77.3)         |                      |
| <b>Sepsis (bacterial/fungal) prior to AKI</b>                 | 9 (36.4)          |                      |
| <b>Cardiovascular collapse prior to AKI</b>                   | 6 (27.3)          |                      |
| <b>AKI on the day of intubation</b>                           | 6 (22.7)          |                      |
| <b>Rhabdomyolysis prior to AKI</b>                            | 0                 |                      |
| <b>Urinary retention &gt; 500 ml (before catheterization)</b> | 0                 |                      |
| <b>Creatinine (mg/dL), mean (median)</b>                      |                   |                      |
| <b>At admission</b>                                           | 1.2 (0.97)        | 0.75 (0.78)          |
| <b>Peak level</b>                                             | 3.51 (3.42)       | 0.85 (0.9)           |
| <b>Final documented value</b>                                 | 1.74 (1.34)       | 0.55 (0.56)          |
| <b>Urea (mg/dL), mean (median)</b>                            |                   |                      |
| <b>At admission</b>                                           | 51.72 (43.5)      | 32.5 (34)            |
| <b>Peak level (at maximal creatinine)</b>                     | 167.13 (164.5)    | 50.14 (44.5)         |
| <b>Final documented value</b>                                 | 98.68 (91.5)      | 53.64 (36)           |
| <b>Urea to creatinine ratio</b>                               |                   |                      |
| <b>At admission</b>                                           | 43.10             | 43.33                |
| <b>Peak level (at maximal creatinine)</b>                     | 47.62             | 58.99                |
| <b>Final documented value</b>                                 | 56.71             | 97.53                |

**Supplementary Table 2:** Comparison of clinical characteristics of COVID-19 patients with and without AKI.
